# Supplementary material
Source: MDPI journal article supplement (https://www.mdpi.com/2073-4336/2/1/1)
Supplement: s2 [file s2]

Treatment 1=exp 2=cont	Session	Period	Group	Subject	type	Contribution	N_cycles	Cycle_mean	Sum_cycles	Leader
1	2	1	1	1	1	5	4	3.50	14	0
1	2	1	1	2	1	5	4	3.50	14	0
1	2	1	1	3	2	15	14	2.00	28	1
1	2	1	1	4	2	15	14	2.00	28	0
1	2	1	2	1	1	2	1	4.00	4	0
1	2	1	2	2	1	2	1	4.00	4	0
1	2	1	2	3	2	10	9	1.89	17	1
1	2	1	2	4	2	12	11	1.55	17	0
1	2	1	3	1	1	5	4	2.50	10	0
1	2	1	3	2	1	5	4	3.25	13	0
1	2	1	3	3	2	10	9	2.22	20	0
1	2	1	3	4	2	15	14	1.57	22	1
1	2	1	4	1	1	4	3	3.67	11	0
1	2	1	4	2	1	2	1	4.00	4	0
1	2	1	4	3	2	10	9	1.78	16	0
1	2	1	4	4	2	10	9	1.89	17	1
1	2	1	5	1	1	5	4	2.25	9	0
1	2	1	5	2	1	5	4	1.50	6	0
1	2	1	5	3	2	15	14	1.86	26	1
1	2	1	5	4	2	15	14	1.79	25	0
1	2	1	6	1	1	5	4	1.75	7	0
1	2	1	6	2	1	4	3	1.67	5	0
1	2	1	6	3	2	7	6	1.83	11	1
1	2	1	6	4	2	4	3	2.00	6	0
1	2	2	1	1	1	5	4	2.75	11	0
1	2	2	1	2	1	3	2	2.50	5	1
1	2	2	1	3	2	15	14	1.71	24	0
1	2	2	1	4	2	15	14	1.64	23	0
1	2	2	2	1	1	4	3	4.00	12	0
1	2	2	2	2	1	4	3	4.00	12	1
1	2	2	2	3	2	12	11	2.36	26	0
1	2	2	2	4	2	12	11	2.27	25	0
1	2	2	3	1	1	5	4	3.25	13	0
1	2	2	3	2	1	5	4	3.00	12	0
1	2	2	3	3	2	12	11	1.82	20	0
1	2	2	3	4	2	15	14	1.43	20	1
1	2	2	4	1	1	5	4	1.25	5	0
1	2	2	4	2	1	5	4	1.25	5	1
1	2	2	4	3	2	15	14	1.50	21	0
1	2	2	4	4	2	15	14	1.50	21	0
1	2	2	5	1	1	3	2	1.00	2	0
1	2	2	5	2	1	5	4	1.75	7	1
1	2	2	5	3	2	5	4	1.75	7	0
1	2	2	5	4	2	0				0
1	2	2	6	1	1	5	4	1.25	5	0
1	2	2	6	2	1	3	2	2.00	4	0
1	2	2	6	3	2	6	5	2.60	13	1
1	2	2	6	4	2	3	2	3.00	6	0
1	2	3	1	1	1	4	3	2.67	8	0
1	2	3	1	2	1	4	3	2.67	8	1
1	2	3	1	3	2	10	9	1.67	15	0
1	2	3	1	4	2	12	11	1.64	18	0
1	2	3	2	1	1	5	4	3.50	14	0
1	2	3	2	2	1	5	4	4.00	16	0
1	2	3	2	3	2	15	14	2.21	31	0
1	2	3	2	4	2	15	14	2.21	31	1
1	2	3	3	1	1	4	3	1.33	4	0
1	2	3	3	2	1	4	3	2.67	8	0
1	2	3	3	3	2	6	5	1.40	7	0
1	2	3	3	4	2	10	9	1.22	11	1
1	2	3	4	1	1	4	3	3.00	9	0
1	2	3	4	2	1	4	3	2.00	6	0
1	2	3	4	3	2	15	14	1.14	16	1
1	2	3	4	4	2	10	9	1.22	11	0
1	2	3	5	1	1	5	4	2.00	8	0
1	2	3	5	2	1	5	4	1.00	4	0
1	2	3	5	3	2	6	5	2.00	10	1
1	2	3	5	4	2	5	4	1.50	6	0
1	2	3	6	1	1	5	4	1.00	4	0
1	2	3	6	2	1	4	3	2.33	7	1
1	2	3	6	3	2	3	2	1.50	3	0
1	2	3	6	4	2	3	2	1.00	2	0
1	2	4	1	1	1	1				0
1	2	4	1	2	1	2	1	4.00	4	0
1	2	4	1	3	2	6	5	2.00	10	1
1	2	4	1	4	2	7	6	1.50	9	0
1	2	4	2	1	1	5	4	3.00	12	0
1	2	4	2	2	1	5	4	3.75	15	0
1	2	4	2	3	2	15	14	2.21	31	1
1	2	4	2	4	2	15	14	2.36	33	0
1	2	4	3	1	1	2	1	2.00	2	0
1	2	4	3	2	1	4	3	1.67	5	1
1	2	4	3	3	2	2	1	1.00	1	0
1	2	4	3	4	2	2	1	3.00	3	0
1	2	4	4	1	1	2	1	1.00	1	0
1	2	4	4	2	1	5	4	1.00	4	0
1	2	4	4	3	2	12	11	1.18	13	1
1	2	4	4	4	2	5	4	1.50	6	0
1	2	4	5	1	1	3	2	2.50	5	0
1	2	4	5	2	1	5	4	2.25	9	0
1	2	4	5	3	2	7	6	2.33	14	1
1	2	4	5	4	2	5	4	1.75	7	0
1	2	4	6	1	1	5	4	1.00	4	0
1	2	4	6	2	1	5	4	1.50	6	0
1	2	4	6	3	2	7	6	1.83	11	1
1	2	4	6	4	2	1				0
1	3	1	1	1	1	5	4	2.75	11	0
1	3	1	1	2	1	5	4	2.25	9	0
1	3	1	1	3	2	7	6	2.17	13	0
1	3	1	1	4	2	8	7	2.00	14	1
1	3	1	2	1	1	5	4	2.75	11	0
1	3	1	2	2	1	5	4	3.00	12	1
1	3	1	2	3	2	11	10	1.70	17	0
1	3	1	2	4	2	12	11	2.00	22	0
1	3	1	3	1	1	5	4	2.00	8	0
1	3	1	3	2	1	0				0
1	3	1	3	3	2	6	5	2.40	12	1
1	3	1	3	4	2	7	6	2.17	13	0
1	3	1	4	1	1	5	4	2.00	8	0
1	3	1	4	2	1	5	4	1.25	5	0
1	3	1	4	3	2	15	14	1.29	18	1
1	3	1	4	4	2	15	14	1.50	21	0
1	3	1	5	1	1	5	4	1.25	5	0
1	3	1	5	2	1	5	4	1.25	5	0
1	3	1	5	3	2	15	14	1.43	20	1
1	3	1	5	4	2	5	4	1.75	7	0
1	3	1	6	1	1	3	2	2.00	4	0
1	3	1	6	2	1	5	4	1.00	4	0
1	3	1	6	3	2	3	2	2.50	5	1
1	3	1	6	4	2	3	2	2.00	4	0
1	3	2	1	1	1	5	4	2.00	8	1
1	3	2	1	2	1	5	4	2.25	9	0
1	3	2	1	3	2	8	7	2.00	14	0
1	3	2	1	4	2	9	8	1.88	15	0
1	3	2	2	1	1	5	4	2.00	8	0
1	3	2	2	2	1	5	4	1.00	4	0
1	3	2	2	3	2	7	6	2.00	12	0
1	3	2	2	4	2	5	4	2.50	10	1
1	3	2	3	1	1	2	1	2.00	2	0
1	3	2	3	2	1	2	1	3.00	3	0
1	3	2	3	3	2	5	4	2.00	8	1
1	3	2	3	4	2	3	2	3.50	7	0
1	3	2	4	1	1	5	4	2.25	9	0
1	3	2	4	2	1	4	3	1.00	3	0
1	3	2	4	3	2	15	14	1.36	19	0
1	3	2	4	4	2	15	14	1.50	21	1
1	3	2	5	1	1	2	1	1.00	1	0
1	3	2	5	2	1	5	4	1.00	4	1
1	3	2	5	3	2	2	1	1.00	1	0
1	3	2	5	4	2	4	3	1.00	3	0
1	3	2	6	1	1	0				0
1	3	2	6	2	1	0				0
1	3	2	6	3	2	3	2	2.00	4	1
1	3	2	6	4	2	3	2	1.50	3	0
1	3	3	1	1	1	5	4	1.00	4	0
1	3	3	1	2	1	4	3	2.67	8	0
1	3	3	1	3	2	5	4	2.75	11	1
1	3	3	1	4	2	6	5	1.80	9	0
1	3	3	2	1	1	5	4	2.00	8	0
1	3	3	2	2	1	5	4	2.00	8	0
1	3	3	2	3	2	3	2	3.50	7	0
1	3	3	2	4	2	4	3	3.33	10	1
1	3	3	3	1	1	1				0
1	3	3	3	2	1	0				0
1	3	3	3	3	2	4	3	2.00	6	1
1	3	3	3	4	2	3	2	2.00	4	0
1	3	3	4	1	1	5	4	2.75	11	0
1	3	3	4	2	1	5	4	1.75	7	0
1	3	3	4	3	2	15	14	1.64	23	0
1	3	3	4	4	2	15	14	1.71	24	1
1	3	3	5	1	1	4	3	2.00	6	0
1	3	3	5	2	1	5	4	2.75	11	0
1	3	3	5	3	2	4	3	3.00	9	0
1	3	3	5	4	2	4	3	2.67	8	1
1	3	3	6	1	1	1				0
1	3	3	6	2	1	0				0
1	3	3	6	3	2	7	6	1.33	8	1
1	3	3	6	4	2	5	4	1.00	4	0
1	3	4	1	1	1	5	4	2.50	10	0
1	3	4	1	2	1	3	2	3.00	6	0
1	3	4	1	3	2	3	2	2.50	5	1
1	3	4	1	4	2	5	4	1.00	4	0
1	3	4	2	1	1	5	4	3.00	12	1
1	3	4	2	2	1	5	4	2.50	10	0
1	3	4	2	3	2	2	1	4.00	4	0
1	3	4	2	4	2	3	2	3.50	7	0
1	3	4	3	1	1	3	2	1.00	2	1
1	3	4	3	2	1	2	1	2.00	2	0
1	3	4	3	3	2	3	2	1.00	2	0
1	3	4	3	4	2	3	2	1.00	2	0
1	3	4	4	1	1	5	4	1.00	4	1
1	3	4	4	2	1	2	1	1.00	1	0
1	3	4	4	3	2	15	14	1.07	15	0
1	3	4	4	4	2	5	4	1.00	4	0
1	3	4	5	1	1	3	2	1.00	2	0
1	3	4	5	2	1	0				0
1	3	4	5	3	2	2	1	2.00	2	0
1	3	4	5	4	2	3	2	2.50	5	1
1	3	4	6	1	1	2	1	3.00	3	1
1	3	4	6	2	1	0				0
1	3	4	6	3	2	1				0
1	3	4	6	4	2	2	1	2.00	2	0
1	7	1	1	1	1	3	2	2.50	5	0
1	7	1	1	2	1	5	4	1.50	6	0
1	7	1	1	3	2	5	4	2.75	11	1
1	7	1	1	4	2	15	14	1.29	18	0
1	7	1	2	1	1	2	1	4.00	4	0
1	7	1	2	2	1	3	2	4.00	8	0
1	7	1	2	3	2	9	8	2.38	19	1
1	7	1	2	4	2	9	8	2.13	17	0
1	7	1	3	1	1	1				0
1	7	1	3	2	1	4	3	3.00	9	0
1	7	1	3	3	2	8	7	1.57	11	0
1	7	1	3	4	2	8	7	1.86	13	1
1	7	1	4	1	1	5	4	1.75	7	0
1	7	1	4	2	1	5	4	2.50	10	0
1	7	1	4	3	2	15	14	2.00	28	0
1	7	1	4	4	2	15	14	1.00	14	1
1	7	1	5	1	1	5	4	2.25	9	0
1	7	1	5	2	1	5	4	2.75	11	0
1	7	1	5	3	2	10	9	1.78	16	0
1	7	1	5	4	2	10	9	2.11	19	1
1	7	1	6	1	1	2	1	4.00	4	1
1	7	1	6	2	1	2	1	4.00	4	0
1	7	1	6	3	2	5	4	1.25	5	0
1	7	1	6	4	2	5	4	1.00	4	0
1	7	2	1	1	1	3	2	3.50	7	0
1	7	2	1	2	1	5	4	3.00	12	1
1	7	2	1	3	2	4	3	3.33	10	0
1	7	2	1	4	2	7	6	1.67	10	0
1	7	2	2	1	1	4	3	3.33	10	0
1	7	2	2	2	1	4	3	3.00	9	0
1	7	2	2	3	2	13	12	2.00	24	0
1	7	2	2	4	2	13	12	2.08	25	1
1	7	2	3	1	1	5	4	1.50	6	1
1	7	2	3	2	1	5	4	3.00	12	0
1	7	2	3	3	2	15	14	1.71	24	0
1	7	2	3	4	2	15	14	1.86	26	0
1	7	2	4	1	1	5	4	1.25	5	0
1	7	2	4	2	1	5	4	2.25	9	0
1	7	2	4	3	2	15	14	1.93	27	0
1	7	2	4	4	2	15	14	1.00	14	1
1	7	2	5	1	1	5	4	1.00	4	1
1	7	2	5	2	1	5	4	1.75	7	0
1	7	2	5	3	2	15	14	1.36	19	0
1	7	2	5	4	2	15	14	1.57	22	0
1	7	2	6	1	1	5	4	3.75	15	0
1	7	2	6	2	1	5	4	3.75	15	0
1	7	2	6	3	2	10	9	2.33	21	1
1	7	2	6	4	2	11	10	2.40	24	0
1	7	3	1	1	1	2	1	4.00	4	0
1	7	3	1	2	1	5	4	1.75	7	0
1	7	3	1	3	2	5	4	1.75	7	1
1	7	3	1	4	2	8	7	1.71	12	0
1	7	3	2	1	1	2	1	4.00	4	0
1	7	3	2	2	1	2	1	1.00	1	0
1	7	3	2	3	2	4	3	1.67	5	0
1	7	3	2	4	2	6	5	1.80	9	1
1	7	3	3	1	1	5	4	2.00	8	0
1	7	3	3	2	1	5	4	3.00	12	0
1	7	3	3	3	2	15	14	2.00	28	0
1	7	3	3	4	2	15	14	1.93	27	1
1	7	3	4	1	1	5	4	2.00	8	0
1	7	3	4	2	1	5	4	2.75	11	0
1	7	3	4	3	2	15	14	2.21	31	0
1	7	3	4	4	2	15	14	1.00	14	1
1	7	3	5	1	1	5	4	1.50	6	0
1	7	3	5	2	1	5	4	1.25	5	0
1	7	3	5	3	2	7	6	2.00	12	1
1	7	3	5	4	2	10	9	1.44	13	0
1	7	3	6	1	1	4	3	4.00	12	0
1	7	3	6	2	1	5	4	3.25	13	0
1	7	3	6	3	2	12	11	2.45	27	0
1	7	3	6	4	2	12	11	2.64	29	1
1	7	4	1	1	1	2	1	1.00	1	0
1	7	4	1	2	1	3	2	1.00	2	0
1	7	4	1	3	2	2	1	2.00	2	1
1	7	4	1	4	2	0				0
1	7	4	2	1	1	2	1	4.00	4	1
1	7	4	2	2	1	1				0
1	7	4	2	3	2	2	1	2.00	2	0
1	7	4	2	4	2	2	1	3.00	3	0
1	7	4	3	1	1	5	4	1.25	5	0
1	7	4	3	2	1	3	2	3.50	7	1
1	7	4	3	3	2	11	10	1.60	16	0
1	7	4	3	4	2	15	14	1.36	19	0
1	7	4	4	1	1	5	4	1.00	4	0
1	7	4	4	2	1	5	4	2.00	8	0
1	7	4	4	3	2	15	14	1.93	27	0
1	7	4	4	4	2	15	14	1.00	14	1
1	7	4	5	1	1	5	4	1.00	4	1
1	7	4	5	2	1	5	4	1.00	4	0
1	7	4	5	3	2	5	4	1.00	4	0
1	7	4	5	4	2	1				0
1	7	4	6	1	1	3	2	4.00	8	1
1	7	4	6	2	1	4	3	3.00	9	0
1	7	4	6	3	2	10	9	2.00	18	0
1	7	4	6	4	2	10	9	2.11	19	0
2	4	1	1	1	1	5	4	2.00	8	1
2	4	1	1	2	1	5	4	1.50	6	0
2	4	1	1	3	2	15	14	1.29	18	0
2	4	1	1	4	2	5	4	2.25	9	0
2	4	1	2	1	1	5	4	1.50	6	0
2	4	1	2	2	1	5	4	1.25	5	0
2	4	1	2	3	2	10	9	1.22	11	0
2	4	1	2	4	2	3	2	1.50	3	1
2	4	1	3	1	1	5	4	2.50	10	0
2	4	1	3	2	1	5	4	2.25	9	1
2	4	1	3	3	2	3	2	3.00	6	0
2	4	1	3	4	2	7	6	2.00	12	0
2	4	1	4	1	1	5	4	1.00	4	1
2	4	1	4	2	1	3	2	1.50	3	0
2	4	1	4	3	2	0				0
2	4	1	4	4	2	10	9	1.11	10	0
2	4	1	5	1	1	5	4	1.75	7	0
2	4	1	5	2	1	5	4	1.50	6	0
2	4	1	5	3	2	4	3	2.67	8	0
2	4	1	5	4	2	15	14	1.07	15	1
2	4	1	6	1	1	0				0
2	4	1	6	2	1	5	4	1.00	4	1
2	4	1	6	3	2	9	8	1.25	10	0
2	4	1	6	4	2	2	1	2.00	2	0
2	4	2	1	1	1	4	3	3.00	9	0
2	4	2	1	2	1	5	4	2.25	9	1
2	4	2	1	3	2	15	14	1.43	20	0
2	4	2	1	4	2	6	5	2.80	14	0
2	4	2	2	1	1	2	1	2.00	2	0
2	4	2	2	2	1	5	4	1.75	7	0
2	4	2	2	3	2	15	14	1.00	14	0
2	4	2	2	4	2	5	4	2.00	8	1
2	4	2	3	1	1	5	4	2.75	11	0
2	4	2	3	2	1	5	4	2.75	11	0
2	4	2	3	3	2	2	1	4.00	4	1
2	4	2	3	4	2	5	4	2.25	9	0
2	4	2	4	1	1	5	4	1.75	7	0
2	4	2	4	2	1	4	3	2.33	7	0
2	4	2	4	3	2	0				0
2	4	2	4	4	2	12	11	1.64	18	1
2	4	2	5	1	1	5	4	3.00	12	0
2	4	2	5	2	1	5	4	2.75	11	0
2	4	2	5	3	2	7	6	1.50	9	0
2	4	2	5	4	2	15	14	1.79	25	1
2	4	2	6	1	1	0				0
2	4	2	6	2	1	5	4	1.00	4	1
2	4	2	6	3	2	5	4	1.00	4	0
2	4	2	6	4	2	5	4	1.00	4	0
2	4	3	1	1	1	4	3	2.67	8	0
2	4	3	1	2	1	5	4	2.00	8	0
2	4	3	1	3	2	5	4	2.25	9	1
2	4	3	1	4	2	1				0
2	4	3	2	1	1	1				1
2	4	3	2	2	1	5	4	1.00	4	0
2	4	3	2	3	2	0		#DIV/0!		0
2	4	3	2	4	2	5	4	1.25	5	0
2	4	3	3	1	1	5	4	1.00	4	0
2	4	3	3	2	1	5	4	1.00	4	1
2	4	3	3	3	2	0				0
2	4	3	3	4	2	0				0
2	4	3	4	1	1	5	4	1.50	6	1
2	4	3	4	2	1	1				0
2	4	3	4	3	2	0				0
2	4	3	4	4	2	10	9	1.33	12	0
2	4	3	5	1	1	5	4	1.75	7	1
2	4	3	5	2	1	5	4	1.75	7	0
2	4	3	5	3	2	5	4	1.00	4	0
2	4	3	5	4	2	0				0
2	4	3	6	1	1	0				0
2	4	3	6	2	1	5	4	1.00	4	1
2	4	3	6	3	2	5	4	1.00	4	0
2	4	3	6	4	2	3	2	1.00	2	0
2	4	4	1	1	1	0				0
2	4	4	1	2	1	5	4	1.00	4	1
2	4	4	1	3	2	5	4	1.00	4	0
2	4	4	1	4	2	0				0
2	4	4	2	1	1	0				0
2	4	4	2	2	1	5	4	1.50	6	0
2	4	4	2	3	2	1				0
2	4	4	2	4	2	3	2	2.00	4	1
2	4	4	3	1	1	0				0
2	4	4	3	2	1	5	4	1.00	4	1
2	4	4	3	3	2	1				0
2	4	4	3	4	2	0				0
2	4	4	4	1	1	5	4	1.00	4	0
2	4	4	4	2	1	3	2	1.00	2	1
2	4	4	4	3	2	0				0
2	4	4	4	4	2	0				0
2	4	4	5	1	1	5	4	1.75	7	1
2	4	4	5	2	1	5	4	1.75	7	0
2	4	4	5	3	2	2	1	1.00	1	0
2	4	4	5	4	2	0				0
2	4	4	6	1	1	0				0
2	4	4	6	2	1	5	4	1.75	7	1
2	4	4	6	3	2	7	6	1.00	6	0
2	4	4	6	4	2	5	4	1.75	7	0
2	5	1	1	1	1	5	4	1.00	4	1
2	5	1	1	2	1	5	4	1.00	4	0
2	5	1	1	3	2	4	3	1.00	3	0
2	5	1	1	4	2	6	5	1.00	5	0
2	5	1	2	1	1	3	2	3.00	6	0
2	5	1	2	2	1	5	4	2.25	9	1
2	5	1	2	3	2	15	14	1.43	20	0
2	5	1	2	4	2	15	14	1.36	19	0
2	5	1	3	1	1	5	4	1.50	6	1
2	5	1	3	2	1	3	2	1.00	2	0
2	5	1	3	3	2	10	9	1.44	13	0
2	5	1	3	4	2	10	9	1.56	14	0
2	5	1	4	1	1	5	4	2.75	11	0
2	5	1	4	2	1	2	1	4.00	4	0
2	5	1	4	3	2	10	9	2.00	18	1
2	5	1	4	4	2	6	5	2.60	13	0
2	5	1	5	1	1	5	4	1.00	4	1
2	5	1	5	2	1	3	2	1.00	2	0
2	5	1	5	3	2	10	9	1.11	10	0
2	5	1	5	4	2	0				0
2	5	1	6	1	1	4	3	1.67	5	0
2	5	1	6	2	1	5	4	2.50	10	1
2	5	1	6	3	2	6	5	2.40	12	0
2	5	1	6	4	2	13	12	1.25	15	0
2	5	2	1	1	1	5	4	1.50	6	0
2	5	2	1	2	1	0				0
2	5	2	1	3	2	4	3	1.00	3	0
2	5	2	1	4	2	7	6	1.50	9	1
2	5	2	2	1	1	4	3	1.00	3	0
2	5	2	2	2	1	5	4	2.25	9	1
2	5	2	2	3	2	15	14	1.50	21	0
2	5	2	2	4	2	7	6	2.33	14	0
2	5	2	3	1	1	5	4	1.00	4	0
2	5	2	3	2	1	4	3	2.67	8	1
2	5	2	3	3	2	12	11	1.64	18	0
2	5	2	3	4	2	15	14	1.43	20	0
2	5	2	4	1	1	5	4	1.00	4	0
2	5	2	4	2	1	1				0
2	5	2	4	3	2	15	14	1.43	20	1
2	5	2	4	4	2	5	4	2.00	8	0
2	5	2	5	1	1	5	4	1.00	4	1
2	5	2	5	2	1	3	2	1.00	2	0
2	5	2	5	3	2	7	6	1.00	6	0
2	5	2	5	4	2	0				0
2	5	2	6	1	1	5	4	1.00	4	0
2	5	2	6	2	1	5	4	2.25	9	0
2	5	2	6	3	2	6	5	2.20	11	1
2	5	2	6	4	2	5	4	2.25	9	0
2	5	3	1	1	1	0				0
2	5	3	1	2	1	2	1	1.00	1	1
2	5	3	1	3	2	5	4	1.25	5	0
2	5	3	1	4	2	1				0
2	5	3	2	1	1	2	1	4.00	4	0
2	5	3	2	2	1	5	4	1.50	6	0
2	5	3	2	3	2	10	9	1.56	14	1
2	5	3	2	4	2	5	4	1.25	5	0
2	5	3	3	1	1	5	4	2.00	8	0
2	5	3	3	2	1	4	3	3.00	9	0
2	5	3	3	3	2	15	14	1.86	26	0
2	5	3	3	4	2	14	13	1.85	24	1
2	5	3	4	1	1	5	4	2.50	10	0
2	5	3	4	2	1	2	1	3.00	3	0
2	5	3	4	3	2	10	9	1.89	17	1
2	5	3	4	4	2	4	3	1.67	5	0
2	5	3	5	1	1	5	4	1.00	4	0
2	5	3	5	2	1	2	1	2.00	2	0
2	5	3	5	3	2	4	3	1.33	4	1
2	5	3	5	4	2	0				0
2	5	3	6	1	1	0				0
2	5	3	6	2	1	5	4	1.25	5	0
2	5	3	6	3	2	5	4	1.00	4	0
2	5	3	6	4	2	5	4	1.50	6	1
2	5	4	1	1	1	0				0
2	5	4	1	2	1	2	1	1.00	1	0
2	5	4	1	3	2	1				0
2	5	4	1	4	2	1				1
2	5	4	2	1	1	1				0
2	5	4	2	2	1	5	4	1.00	4	1
2	5	4	2	3	2	0				0
2	5	4	2	4	2	5	4	1.25	5	0
2	5	4	3	1	1	3	2	1.00	2	1
2	5	4	3	2	1	0				0
2	5	4	3	3	2	13	12	1.00	12	0
2	5	4	3	4	2	15	14	1.00	14	0
2	5	4	4	1	1	5	4	2.00	8	0
2	5	4	4	2	1	2	1	4.00	4	0
2	5	4	4	3	2	10	9	1.56	14	1
2	5	4	4	4	2	8	7	1.00	7	0
2	5	4	5	1	1	5	4	1.00	4	1
2	5	4	5	2	1	1				0
2	5	4	5	3	2	2	1	1.00	1	0
2	5	4	5	4	2	0				0
2	5	4	6	1	1	1				0
2	5	4	6	2	1	5	4	1.50	6	1
2	5	4	6	3	2	5	4	1.25	5	0
2	5	4	6	4	2	0				0
2	6	1	1	1	1	5	4	1.00	4	1
2	6	1	1	2	1	5	4	2.25	9	0
2	6	1	1	3	2	5	4	2.25	9	0
2	6	1	1	4	2	15	14	1.36	19	0
2	6	1	2	1	1	3	2	2.00	4	0
2	6	1	2	2	1	5	4	1.50	6	0
2	6	1	2	3	2	10	9	1.56	14	1
2	6	1	2	4	2	1				0
2	6	1	3	1	1	5	4	1.50	6	1
2	6	1	3	2	1	5	4	1.00	4	0
2	6	1	3	3	2	5	4	2.25	9	0
2	6	1	3	4	2	3	2	3.00	6	0
2	6	1	4	1	1	5	4	1.25	5	1
2	6	1	4	2	1	2	1	1.00	1	0
2	6	1	4	3	2	12	11	1.09	12	0
2	6	1	4	4	2	5	4	1.25	5	0
2	6	1	5	1	1	5	4	1.50	6	0
2	6	1	5	2	1	5	4	1.00	4	1
2	6	1	5	3	2	15	14	1.43	20	0
2	6	1	5	4	2	10	9	1.33	12	0
2	6	1	6	1	1	0				0
2	6	1	6	2	1	5	4	1.75	7	0
2	6	1	6	3	2	7	6	1.83	11	0
2	6	1	6	4	2	15	14	1.43	20	1
2	6	2	1	1	1	5	4	1.00	4	1
2	6	2	1	2	1	5	4	2.25	9	0
2	6	2	1	3	2	15	14	1.43	20	0
2	6	2	1	4	2	13	12	1.42	17	0
2	6	2	2	1	1	2	1	2.00	2	0
2	6	2	2	2	1	5	4	1.50	6	0
2	6	2	2	3	2	5	4	1.50	6	1
2	6	2	2	4	2	5	4	1.00	4	0
2	6	2	3	1	1	4	3	1.67	5	1
2	6	2	3	2	1	5	4	1.00	4	0
2	6	2	3	3	2	7	6	1.00	6	0
2	6	2	3	4	2	2	1	2.00	2	0
2	6	2	4	1	1	5	4	1.00	4	1
2	6	2	4	2	1	3	2	1.00	2	0
2	6	2	4	3	2	9	8	1.13	9	0
2	6	2	4	4	2	5	4	1.00	4	0
2	6	2	5	1	1	5	4	3.00	12	0
2	6	2	5	2	1	5	4	3.00	12	0
2	6	2	5	3	2	15	14	2.21	31	1
2	6	2	5	4	2	15	14	1.79	25	0
2	6	2	6	1	1	0				0
2	6	2	6	2	1	5	4	1.50	6	0
2	6	2	6	3	2	3	2	1.00	2	0
2	6	2	6	4	2	8	7	1.43	10	1
2	6	3	1	1	1	5	4	1.50	6	1
2	6	3	1	2	1	5	4	1.00	4	0
2	6	3	1	3	2	3	2	1.50	3	0
2	6	3	1	4	2	2	1	1.00	1	0
2	6	3	2	1	1	1				0
2	6	3	2	2	1	5	4	1.50	6	1
2	6	3	2	3	2	2	1	3.00	3	0
2	6	3	2	4	2	0				0
2	6	3	3	1	1	3	2	1.50	3	0
2	6	3	3	2	1	3	2	1.00	2	0
2	6	3	3	3	2	0				0
2	6	3	3	4	2	3	2	1.50	3	1
2	6	3	4	1	1	5	4	1.75	7	0
2	6	3	4	2	1	2	1	2.00	2	0
2	6	3	4	3	2	0				0
2	6	3	4	4	2	5	4	2.25	9	1
2	6	3	5	1	1	5	4	3.25	13	1
2	6	3	5	2	1	5	4	2.25	9	0
2	6	3	5	3	2	15	14	2.00	28	0
2	6	3	5	4	2	15	14	1.50	21	0
2	6	3	6	1	1	0				0
2	6	3	6	2	1	5	4	2.00	8	0
2	6	3	6	3	2	8	7	1.00	7	0
2	6	3	6	4	2	10	9	1.56	14	1
2	6	4	1	1	1	5	4	1.00	4	1
2	6	4	1	2	1	5	4	1.25	5	0
2	6	4	1	3	2	0				0
2	6	4	1	4	2	10	9	1.22	11	0
2	6	4	2	1	1	1				0
2	6	4	2	2	1	5	4	1.00	4	1
2	6	4	2	3	2	1				0
2	6	4	2	4	2	0				0
2	6	4	3	1	1	0				0
2	6	4	3	2	1	3	2	1.00	2	1
2	6	4	3	3	2	0				0
2	6	4	3	4	2	0				0
2	6	4	4	1	1	5	4	1.50	6	1
2	6	4	4	2	1	1				0
2	6	4	4	3	2	0				0
2	6	4	4	4	2	5	4	1.50	6	0
2	6	4	5	1	1	5	4	2.25	9	0
2	6	4	5	2	1	5	4	2.50	10	0
2	6	4	5	3	2	10	9	1.78	16	1
2	6	4	5	4	2	1				0
2	6	4	6	1	1	0				0
2	6	4	6	2	1	5	4	1.50	6	0
2	6	4	6	3	2	10	9	1.00	9	0
2	6	4	6	4	2	10	9	1.33	12	1
