# Supplementary material
Source: MDPI journal article supplement (https://www.mdpi.com/2073-4336/2/1/1)
Supplement: s3 [file s3]

Treatment 1=exp 2=cont	Session	Period	Group	Cycle_low_endowment	Cycle_high_endowment	Cycle_all	Cont1	Cont2	Cont3	Cont4	Leader	Exp_low	Exp_high	Max_low	Max_high	p_low	p_high
1	2	1	1	3.50	2.00	2.333333333	5	5	15	15	3	2.41	1.79	3.63	2.29	0.00	0.08
1	2	1	2	4.00	1.70	1.909090909	2	2	10	12	3	2.41	1.63	4.00	2.20	0.00	0.30
1	2	1	3	2.88	1.83	2.096774194	5	5	10	15	4	2.39	1.82	3.88	2.39	0.10	0.44
1	2	1	4	3.75	1.83	2.181818182	4	2	10	10	4	2.32	1.75	3.75	2.28	0.00	0.28
1	2	1	5	1.88	1.82	1.833333333	5	5	15	15	3	2.42	1.80	4.00	2.21	0.89	0.42
1	2	1	6	1.71	1.89	1.8125	5	4	7	4	3	2.25	2.07	3.57	3.00	0.87	0.64
1	2	2	1	2.67	1.68	1.852941176	5	3	15	15	2	2.37	1.73	3.67	2.18	0.21	0.58
1	2	2	2	4.00	2.32	2.678571429	4	4	12	12	2	2.40	1.79	4.00	2.32	0.00	0.00
1	2	2	3	3.13	1.60	1.96969697	5	5	12	15	4	2.41	1.82	3.63	2.40	0.03	0.89
1	2	2	4	1.25	1.50	1.444444444	5	5	15	15	2	2.40	1.80	3.50	2.25	1.00	0.97
1	2	2	5	1.50	1.75	1.6	3	5	5	0	2	1.78	1.72	2.83	2.75	0.73	0.31
1	2	2	6	1.50	2.71	2.153846154	5	3	6	3	3	2.11	2.01	3.33	3.43	0.89	0.02
1	2	3	1	2.67	1.65	1.884615385	4	4	10	12	2	2.39	1.82	4.00	2.50	0.24	0.77
1	2	3	2	3.75	2.21	2.555555556	5	5	15	15	4	2.40	1.79	3.75	2.25	0.00	0.00
1	2	3	3	2.00	1.29	1.5	4	4	6	10	4	2.36	1.89	3.83	2.64	0.72	0.99
1	2	3	4	2.50	1.17	1.448275862	4	4	15	10	3	2.38	1.74	3.67	2.35	0.33	1.00
1	2	3	5	1.50	1.78	1.647058824	5	5	6	5	3	2.29	2.21	3.50	3.33	0.97	0.85
1	2	3	6	1.57	1.25	1.454545455	5	4	3	3	2	2.05	2.27	3.29	4.00	0.86	0.95
1	2	4	1	4.00	1.73	1.916666667	1	2	6	7	3	2.28	1.69	4.00	2.45	0.00	0.38
1	2	4	2	3.38	2.29	2.527777778	5	5	15	15	3	2.43	1.80	3.75	2.29	0.01	0.00
1	2	4	3	1.75	2.00	1.833333333	2	4	2	2	2	1.90	2.29	3.25	4.00	0.52	0.48
1	2	4	4	1.00	1.27	1.2	2	5	12	5	3	2.20	1.71	3.60	2.33	1.00	0.97
1	2	4	5	2.33	2.10	2.1875	3	5	7	5	3	2.24	2.02	3.50	2.80	0.33	0.34
1	2	4	6	1.25	1.83	1.5	5	5	7	1	3	1.98	1.76	2.88	2.50	0.98	0.30
1	3	1	1	2.50	2.08	2.238095238	5	5	7	8	4	2.36	2.08	3.75	2.92	0.30	0.44
1	3	1	2	2.88	1.86	2.137931034	5	5	11	12	2	2.40	1.90	4.00	2.48	0.08	0.55
1	3	1	3	2.00	2.27	2.2	5	0	6	7	3	1.90	1.76	3.00	2.55	0.29	0.01
1	3	1	4	1.63	1.39	1.444444444	5	5	15	15	3	2.38	1.79	3.63	2.36	0.96	0.99
1	3	1	5	1.25	1.50	1.423076923	5	5	15	5	3	2.32	1.71	3.63	2.28	1.00	0.83
1	3	1	6	1.33	2.25	1.7	3	5	3	3	3	2.05	2.26	3.17	3.75	0.93	0.43
1	3	2	1	2.13	1.93	2	5	5	8	9	1	2.38	2.02	3.50	2.73	0.69	0.60
1	3	2	2	1.50	2.20	1.888888889	5	5	7	5	4	2.25	2.13	3.50	3.20	0.97	0.36
1	3	2	3	2.50	2.50	2.5	2	2	5	3	3	2.31	1.87	4.00	2.83	0.31	0.03
1	3	2	4	1.71	1.43	1.485714286	5	4	15	15	4	2.37	1.76	3.57	2.18	0.91	0.98
1	3	2	5	1.00	1.00	1	2	5	2	4	2	1.90	2.04	3.00	3.50	0.98	0.98
1	3	2	6		1.75	1.75	0	0	3	3	3	1.90	1.39	3.00	2.00	#N/A	0.06
1	3	3	1	1.71	2.22	2	5	4	5	6	3	2.28	2.15	3.57	3.11	0.87	0.37
1	3	3	2	2.00	3.40	2.538461538	5	5	3	4	4	2.06	2.28	3.00	3.80	0.50	0.01
1	3	3	3		2.00	2	1	0	4	3	3	2.06	1.57	3.00	2.40	#N/A	0.06
1	3	3	4	2.25	1.68	1.805555556	5	5	15	15	4	2.41	1.79	3.75	2.29	0.60	0.74
1	3	3	5	2.43	2.83	2.615384615	4	5	4	4	4	2.16	2.23	3.43	3.50	0.20	0.07
1	3	3	6		1.20	1.2	1	0	7	5	3	2.16	1.48	3.43	2.00	#N/A	0.88
1	3	4	1	2.67	1.50	2.083333333	5	3	3	5	3	2.13	2.11	3.33	3.33	0.07	0.91
1	3	4	2	2.75	3.67	3	5	5	2	3	1	1.92	2.25	2.88	4.00	0.00	0.01
1	3	4	3	1.33	1.00	1.142857143	3	2	3	3	1	2.15	2.08	4.00	4.00	0.85	0.98
1	3	4	4	1.00	1.06	1.043478261	5	2	15	5	1	2.19	1.58	3.40	2.11	1.00	1.00
1	3	4	5	1.00	2.33	1.8	3	0	2	3	4	1.70	1.75	3.00	3.00	0.79	0.06
1	3	4	6	3.00	2.00	2.5	2	0	1	2	1	1.60	1.63	3.00	3.00	0.00	0.15
1	7	1	1	1.83	1.61	1.666666667	3	5	5	15	3	2.27	1.62	3.50	2.22	0.78	0.46
1	7	1	2	4.00	2.25	2.526315789	2	3	9	9	3	2.33	1.73	4.00	2.31	0.00	0.00
1	7	1	3	3.00	1.71	1.941176471	1	4	8	8	4	2.11	1.75	3.33	2.43	0.02	0.51
1	7	1	4	2.13	2.07	1.638888889	5	5	15	15	4	2.40	1.79	3.63	2.36	0.69	0.03
1	7	1	5	2.50	1.94	2.115384615	5	5	10	10	4	2.40	1.95	3.50	2.56	0.35	0.47
1	7	1	6	4.00	1.13	1.7	2	2	5	5	1	2.34	1.84	4.00	2.88	0.00	0.99
1	7	2	1	3.17	2.22	2.6	3	5	4	7	2	2.22	2.01	3.50	2.89	0.01	0.22
1	7	2	2	3.17	2.04	2.266666667	4	4	13	13	4	2.39	1.77	3.83	2.25	0.04	0.04
1	7	2	3	2.25	1.79	1.888888889	5	5	15	15	1	2.41	1.80	3.75	2.21	0.59	0.47
1	7	2	4	1.75	2.00	1.527777778	5	5	15	15	4	2.41	1.79	3.63	2.25	0.92	0.07
1	7	2	5	1.38	1.46	1.444444444	5	5	15	15	1	2.38	1.80	3.50	2.36	1.00	0.97
1	7	2	6	3.75	2.37	2.777777778	5	5	10	11	3	2.39	1.94	3.75	2.63	0.00	0.01
1	7	3	1	2.20	1.73	1.875	2	5	5	8	3	2.17	1.90	3.40	2.82	0.37	0.66
1	7	3	2	2.50	1.75	1.9	2	2	4	6	4	2.36	1.81	4.00	2.75	0.30	0.52
1	7	3	3	2.50	1.96	2.083333333	5	5	15	15	4	2.44	1.80	3.63	2.25	0.36	0.13
1	7	3	4	2.38	2.29	1.777777778	5	5	15	15	4	2.41	1.80	3.50	2.36	0.47	0.00
1	7	3	5	1.38	1.67	1.565217391	5	5	7	10	3	2.36	2.01	3.50	2.73	0.99	0.91
1	7	3	6	3.57	2.55	2.793103448	4	5	12	12	4	2.39	1.84	3.57	2.55	0.00	0.00
1	7	4	1	1.00	2.00	1.25	2	3	2	0	3	1.69	1.82	3.00	3.00	0.85	0.24
1	7	4	2	4.00	2.50	3	2	1	2	2	1	2.09	2.03	4.00	4.00	0.00	0.19
1	7	4	3	2.00	1.46	1.566666667	5	3	11	15	2	2.35	1.75	3.83	2.29	0.71	0.94
1	7	4	4	1.50	2.04	1.472222222	5	5	15	15	4	2.39	1.80	3.50	2.32	0.98	0.04
1	7	4	5	1.00	1.00	1	5	5	5	1	1	1.90	1.93	3.13	3.25	1.00	0.98
1	7	4	6	3.40	2.06	2.347826087	3	4	10	10	1	2.41	1.82	4.00	2.50	0.01	0.09
2	4	1	1	1.75	1.50	1.576923077	5	5	15	5	1	2.30	1.71	3.38	2.22	0.89	0.80
2	4	1	2	1.38	1.27	1.315789474	5	5	10	3	4	2.19	1.82	3.25	2.55	0.97	0.96
2	4	1	3	2.38	2.25	2.3125	5	5	3	7	2	2.17	2.05	3.13	3.13	0.24	0.22
2	4	1	4	1.17	1.11	1.133333333	5	3	0	10	1	1.83	1.42	2.67	1.78	0.96	0.93
2	4	1	5	1.63	1.35	1.44	5	5	4	15	4	2.28	1.66	3.38	2.24	0.94	0.91
2	4	1	6	1.00	1.33	1.230769231	0	5	9	2	2	1.70	1.48	2.50	2.00	0.97	0.65
2	4	2	1	2.57	1.79	2	4	5	15	6	2	2.33	1.70	3.43	2.32	0.24	0.29
2	4	2	2	1.80	1.22	1.347826087	2	5	15	5	4	2.18	1.58	3.40	2.06	0.71	0.96
2	4	2	3	2.75	2.60	2.692307692	5	5	2	5	3	2.02	2.12	3.13	3.40	0.01	0.11
2	4	2	4	2.00	1.64	1.777777778	5	4	0	12	4	1.89	1.40	2.86	1.73	0.28	0.02
2	4	2	5	2.88	1.70	2.035714286	5	5	7	15	4	2.36	1.77	3.75	2.35	0.08	0.59
2	4	2	6	1.00	1.00	1	0	5	5	5	2	1.80	1.81	2.75	2.75	0.98	1.00
2	4	3	1	2.29	2.25	2.272727273	4	5	5	1	3	1.94	1.89	3.14	3.00	0.13	0.11
2	4	3	2	1.00	1.25	1.125	1	5	0	5	1	1.51	1.51	2.25	2.25	0.93	0.70
2	4	3	3	1.00		1	5	5	0	0	2	1.41	1.51	2.00	2.25	0.94	#N/A
2	4	3	4	1.50	1.33	1.384615385	5	1	0	10	1	1.63	1.33	2.25	1.67	0.51	0.34
2	4	3	5	1.75	1.00	1.5	5	5	5	0	1	1.82	1.80	2.75	2.75	0.50	0.98
2	4	3	6	1.00	1.00	1	0	5	5	3	2	1.70	1.78	2.75	2.83	0.96	0.99
2	4	4	1	1.00	1.00	1	0	5	5	0	2	1.42	1.40	2.00	2.00	0.93	0.92
2	4	4	2	1.50	2.00	1.666666667	0	5	1	3	4	1.43	1.66	2.00	2.50	0.22	0.09
2	4	4	3	1.00		1	0	5	1	0	2	1.11	1.66	1.25	2.50	0.44	#N/A
2	4	4	4	1.00		1	5	3	0	0	2	1.37	1.66	1.83	2.50	0.85	#N/A
2	4	4	5	1.75	1.00	1.666666667	5	5	2	0	1	1.61	1.93	2.50	3.00	0.21	0.63
2	4	4	6	1.75	1.30	1.428571429	0	5	7	5	2	1.86	1.75	2.75	2.60	0.50	0.94
2	5	1	1	1.00	1.00	1	5	5	4	6	1	2.21	2.17	3.50	3.25	1.00	1.00
2	5	1	2	2.50	1.39	1.588235294	3	5	15	15	2	2.35	1.73	3.67	2.18	0.30	0.98
2	5	1	3	1.33	1.50	1.458333333	5	3	10	10	1	2.34	1.86	3.67	2.56	0.99	0.94
2	5	1	4	3.00	2.21	2.421052632	5	2	10	6	3	2.23	1.82	3.40	2.64	0.03	0.04
2	5	1	5	1.00	1.11	1.066666667	5	3	10	0	1	1.83	1.42	2.83	1.89	1.00	0.93
2	5	1	6	2.14	1.59	1.75	4	5	6	13	2	2.34	1.79	3.71	2.47	0.62	0.79
2	5	2	1	1.50	1.33	1.384615385	5	0	4	7	4	1.82	1.72	3.00	2.44	0.71	0.88
2	5	2	2	1.71	1.75	1.740740741	4	5	15	7	2	2.35	1.75	3.71	2.30	0.90	0.45
2	5	2	3	1.71	1.52	1.5625	5	4	12	15	2	2.41	1.78	3.71	2.32	0.93	0.93
2	5	2	4	1.00	1.56	1.454545455	5	1	15	5	3	2.05	1.55	3.25	2.00	0.99	0.41
2	5	2	5	1.00	1.00	1	5	3	7	0	1	1.83	1.57	2.83	2.33	0.99	0.99
2	5	2	6	1.63	2.22	1.941176471	5	5	6	5	3	2.27	2.21	3.38	3.22	0.93	0.43
2	5	3	1	1.00	1.25	1.2	0	2	5	1	2	1.75	1.34	3.00	1.75	0.58	0.46
2	5	3	2	2.00	1.46	1.611111111	2	5	10	5	3	2.18	1.77	3.40	2.46	0.55	0.86
2	5	3	3	2.43	1.85	1.970588235	5	4	15	14	4	2.38	1.77	3.57	2.26	0.40	0.27
2	5	3	4	2.60	1.83	2.058823529	5	2	10	4	3	2.16	1.75	3.60	2.42	0.13	0.32
2	5	3	5	1.20	1.33	1.25	5	2	4	0	3	1.66	1.71	2.60	2.67	0.85	0.71
2	5	3	6	1.25	1.25	1.25	0	5	5	5	4	1.82	1.83	2.75	2.75	0.90	0.97
2	5	4	1	1.00		1	0	2	1	1	4	1.50	1.83	3.00	2.75	0.39	#N/A
2	5	4	2	1.00	1.25	1.125	1	5	0	5	2	1.51	1.52	2.25	2.25	0.93	0.70
2	5	4	3	1.00	1.00	1	3	0	13	15	1	2.02	1.55	3.00	1.96	0.90	1.00
2	5	4	4	2.40	1.31	1.571428571	5	2	10	8	3	2.23	1.82	3.60	2.50	0.28	0.99
2	5	4	5	1.00	1.00	1	5	1	2	0	1	1.33	1.74	1.75	3.00	0.75	0.57
2	5	4	6	1.50	1.25	1.375	1	5	5	0	2	1.54	1.52	2.25	2.25	0.38	0.70
2	6	1	1	1.63	1.56	1.576923077	5	5	5	15	1	2.30	1.70	3.38	2.22	0.93	0.73
2	6	1	2	1.67	1.56	1.6	3	5	10	1	3	1.99	1.48	3.00	2.00	0.75	0.27
2	6	1	3	1.25	2.50	1.785714286	5	5	5	3	1	2.13	2.20	3.38	3.50	0.99	0.19
2	6	1	4	1.20	1.13	1.15	5	2	12	5	1	2.20	1.69	3.40	2.40	0.99	1.00
2	6	1	5	1.25	1.39	1.35483871	5	5	15	10	2	2.41	1.82	3.63	2.35	1.00	0.99
2	6	1	6	1.75	1.55	1.583333333	0	5	7	15	4	1.97	1.56	3.00	2.00	0.61	0.45
2	6	2	1	1.63	1.42	1.470588235	5	5	15	13	1	2.43	1.82	3.63	2.35	0.97	0.98
2	6	2	2	1.60	1.25	1.384615385	2	5	5	5	3	2.10	2.01	3.40	3.13	0.82	0.99
2	6	2	3	1.29	1.14	1.214285714	4	5	7	2	1	2.10	1.91	3.14	2.71	0.98	0.99
2	6	2	4	1.00	1.08	1.055555556	5	3	9	5	1	2.24	1.91	3.50	2.67	1.00	1.00
2	6	2	5	3.00	2.00	2.222222222	5	5	15	15	3	2.41	1.79	3.75	2.29	0.06	0.07
2	6	2	6	1.50	1.33	1.384615385	0	5	3	8	4	1.77	1.61	2.75	2.22	0.68	0.83
2	6	3	1	1.25	1.33	1.272727273	5	5	3	2	1	1.94	2.30	3.00	4.00	0.97	0.88
2	6	3	2	1.50	3.00	1.8	1	5	2	0	2	1.34	1.72	1.75	3.00	0.11	0.00
2	6	3	3	1.25	1.50	1.333333333	3	3	0	3	4	1.79	1.78	3.00	3.00	0.80	0.54
2	6	3	4	1.80	2.25	2	5	2	0	5	4	1.70	1.63	2.40	2.25	0.28	0.00
2	6	3	5	2.75	1.75	1.972222222	5	5	15	15	1	2.41	1.79	3.63	2.32	0.17	0.57
2	6	3	6	2.00	1.31	1.45	0	5	8	10	4	1.96	1.70	3.00	2.25	0.35	0.97
2	6	4	1	1.13	1.22	1.176470588	5	5	0	10	1	1.88	1.52	2.75	2.00	0.99	0.91
2	6	4	2	1.00		1	1	5	1	0	2	1.24	1.52	1.50	2.00	0.64	#N/A
2	6	4	3	1.00		1	0	3	0	0	2	1.00	1.52	1.00	2.00	0.00	#N/A
2	6	4	4	1.50	1.50	1.5	5	1	0	5	1	1.51	1.51	2.25	2.25	0.35	0.33
2	6	4	5	2.38	1.78	2.058823529	5	5	10	1	3	2.00	1.58	2.88	2.11	0.10	0.12
2	6	4	6	1.50	1.17	1.227272727	0	5	10	10	4	1.98	1.69	3.00	2.22	0.81	1.00
